# Supplementary material for: Facile synthesis of CuInGaS2 quantum dot nanoparticles for bilayer-sensitized solar cells
Source: Royal Society of Chemistry journal article supplement (doi:10.1039/c4dt02150a), 2014-01-01
Supplement: c4dt02150a1.pdf [file c4dt02150a1.pdf]

## Supporting Information

### Facile Synthesis of CuInGaS<sub>2</sub> Quantum Dots Nanoparticles for Bilayer-Sensitized Solar Cells

Jinjin Zhao<sup>†‡¶\*</sup>, Jiangbin Zhang<sup>†</sup>, Wenna Wang<sup>†#</sup>, Peng Wang<sup>†</sup>, Feng Li<sup>†</sup>, Deliang Ren<sup>†‡</sup>, Huanyan Si<sup>†</sup>,  
Xiuguo Sun<sup>†</sup>, Fengqiu Ji<sup>†</sup> and Yanzhong Hao<sup>§\*</sup>

<sup>†</sup>School of Materials Science and Engineering, Shijiazhuang Tiedao University, 17 Northeast, Second Inner Ring, Shijiazhuang, 050043, China.

<sup>‡</sup>College Physics Science and technology, Photovoltaic Research and Development Center, Hebei University, No.180 Wusidong Road. Baoding City, Hebei Province, 071002, China

<sup>¶</sup>The Key Laboratory for Health Monitoring and Control of Large Structures, Hebei province, 17 Northeast, Second Inner Ring, Shijiazhuang, 050043, China.

<sup>§</sup> College of Science, Hebei University of Science and Technology, 26 Yuxiang Street, Shijiazhuang 050018, China

<sup>#</sup>Yingli Energy (China) Co., Ltd., 3399 North Chaoyang Avenue, Baoding 071051, China

*E-mail: jinjinzhao2012@163.com; yzhao@hebust.edu.cn*

## Experimental Section

### I. Chemicals

Copper chloride (CuCl<sub>2</sub>), Indium(III) chloride tetrahydrate (InCl<sub>3</sub> • 4H<sub>2</sub>O, 39%), Sodium sulfide, Titanium tetrachloride (99.5%), Ethanol (98%), Nitric acid (65%) were purchased from Sinopharm Chemical Reagent Co., Ltd; F127 was purchased from Sigma-Aldrich, Inc. Polyethylene glycol (PEG; 20000 in molecularweight) and Gallium(III) chloride (GaCl<sub>3</sub>) were purchased from J&K. The sensitizer N719 (Cis-di(thiocyanato)-N,N-bis(2,2'-bipyridyl-4,4'-dicarboxylate)Ru(II)bis-tetrabutylammonium) electrolyte, surlyn film were purchased from Yingkou Opvtech New Energy Co., Ltd.

### II. Synthesis of the TiO<sub>2</sub>@CIGS film and fabrication of Quantum Dot-Dye Bilayer-Sensitized Solar Cells (QDBSC)

### 2.1 Synthesis of $\text{TiO}_2$ nanoparticles

$\text{TiO}_2$  nanoparticles were synthesized as the following method. 2.97g F127 was firstly dissolved in 36.88g ethanol at  $40^\circ\text{C}$  for 30 minutes to form a clear solution. Then 3.4g  $\text{TiCl}_4$  was added to the obtained solution. The precursor solutions were placed into a Teflon-lined stainless steel autoclave (100 mL in capacity) after stirring 8h under  $40^\circ\text{C}$ . The autoclave was placed in an oven at  $160^\circ\text{C}$  for 16h. Subsequently, the products were filtered, washed and dried at  $80^\circ\text{C}$ . Finally, the powders were sintered at  $610^\circ\text{C}$  for 10 minutes after being kept at  $300^\circ\text{C}$  for 90 minutes and  $500^\circ\text{C}$  for 240 minutes. During the whole process, the heating rate was kept at a constant of  $2^\circ\text{C}/\text{min}$ . After sintering, the products were dispersed using deionized water and nitric acid (65%) until the pH of the solution reached to about 2<sup>1</sup>. Then the mixture solution was vigorous stirred at  $80^\circ\text{C}$  for 8 hours to obtain  $\text{TiO}_2$  nano particles.

### 2.2 Preparation of $\text{TiO}_2@\text{CIGS}$ nanoparticles

In step A, a certain amount of  $\text{TiO}_2$  nanoparticles was put into a vessel and subjected to vacuum. After thirty minutes' vacuum, the mixed solution of  $\text{InCl}_3/\text{GaCl}_3$  (0.1mol/L) was allowed to enter the system until normal atmospheric pressure was achieved, then the system was held for ten minutes before the mixed solution of  $\text{InCl}_3/\text{GaCl}_3$  was removed by evaporation. The precipitate was dried under flowing air at  $80^\circ\text{C}$ . After drying, the powder was washed twice with absolute ethanol. Then, the drying under flowing air was took again. Step B and step C were repeated as described step A other than the  $\text{InCl}_3/\text{GaCl}_3$  was replaced by 0.2 mol/L  $\text{CuCl}_2$  aqueous and 0.4mol/L  $\text{Na}_2\text{S}$  aqueous, respectively. after step A, B and C, the samples were calcined in Ar gases at  $500^\circ\text{C}$  for 1h to obtain  $\text{TiO}_2@\text{CIGS}$  nanoparticles.

### 2.3 Preparation of Mesoporous $\text{TiO}_2$ films and $\text{TiO}_2@\text{CIGS}$ film

The mesoporous  $\text{TiO}_2$  films were prepared by the doctor-blade method. First of all, the  $\text{TiO}_2$  paste was made with the  $\text{TiO}_2$  nanoparticles synthesized in section 2.2. Briefly, 0.8g  $\text{TiO}_2$  was added in a mixed solution of ethanol/ deionized water(3:1) and treated using ultrasonic for 30 minutes after the addition of PEG aqueous which acted as the pore-forming material. Then they were grinded into ropiness in agate mortar. A mask, with a window encompassed by 3M scotch tape, was used to definethe  $5\text{mm} \times 5\text{mm}$  area which was used to spread the paste dropped one edge of the window with

a glass slide on the conductive glass ( $\text{SnO}_2\text{:F}$  coated glass, FTO). Subsequently, The as-prepared  $\text{TiO}_2$  films were sintered in air with the heating rate of  $2^\circ\text{C}/\text{min}$  to  $300^\circ\text{C}$  for 30 min,  $500^\circ\text{C}$  for 60 min.

The procedure of synthesis of mesoporous  $\text{TiO}_2@\text{CIGS}$  film was the same as described above.

#### *2.4 Fabrication of Quantum Dot-Dye Bilayer-Sensitized Solar Cells (QDBSC)*

The mesoporous  $\text{TiO}_2$  film and  $\text{TiO}_2@\text{CIGS}$  film were sensitized with N719 dye by direct adsorption. Firstly, the as-prepared  $\text{TiO}_2$  film and  $\text{TiO}_2@\text{CIGS}$  film were heated to  $80^\circ\text{C}$  and immersed in the N719 ethanol solution ( $0.5\text{mM}$ ) for 24h. After rinsing the film in solution by ethanol and drying, the desired mesoporous  $\text{TiO}_2/\text{N719}$  film and  $\text{TiO}_2@\text{CIGS} / \text{N719}$  electrodes were obtained.

The photovoltaic cells were assembled with the mesoporous  $\text{TiO}_2/\text{N719}$  film or  $\text{TiO}_2@ \text{CIGS}/ \text{N719}$  photoelectrode, Pt coated counter electrode, and  $60\mu\text{m}$  thick sealing material (OPV-SN-60). Commercially available electrolyte of  $\text{I}_3^-/\text{I}^-$  was injected into the space between the photoelectrode and counter electrode.

### **III. Characterization**

XRD patterns of powders were obtained using D8 Advance(Germany) diffractometer with  $\text{Cu K}\alpha$  radiation (40 kV and 40 mA) with the scanning rate of  $4^\circ \text{min}^{-1}$  for wide angle tests. The  $\text{N}_2$  sorption measurements were performed using Micromeritics Tristar 3000 for mesoporosity and Micromeritics ASAP 2020 porosimeters and microporosity at 77 K , respectively. The mesoporous specific surface area and the pore size distribution were calculated using the Brunauer–Emmett–Teller (BET) methods. SEM (Scanning Electron Microscopy) analysis was performed on a Hitachi-S-4800 electron microscope. TEM (Transmission electron microscopy ) images were obtained on a JEOL-2010F electron microscope operated at 200 kV. The UV/Vis absorbance spectra were measured using a Shimadzu UV-2550 spectrophotometer. Photovoltaic measurement (J-V) was recorded with a Newport Oriel class AAA solar simulator (model 92250A-1000) equipped with a class A 300 W xenon light source powered by a Newport power supply (model 69907). The power output of the lamp was calibrated to 1 Sun ( $\text{AM1.5G}$ ,  $100 \text{ mW}/\text{cm}^2$ ) using a certified Si reference cell (VLSI standard, S/N 10510-0031). The current-voltage characteristics of each cell were recorded with a Keithley-2400 digital source meter. Photovoltaic performance was measured using a mask with an aperture area of  $0.25\text{cm}^2$ . The incident photon-to-current efficiency (IPCE) was measured in DC mode with a 1/4 m double monochromator (Crowntech DK242), a multi-meter (Keithley 2000), and two light sources depending on the wavelength range required (300–600 nm: xenon lamp, 300 W; 600–900 nm:

tungsten-halogen lamp, 150 W). The monochromatic light intensity for IPCE efficiency was calibrated with a reference silicon photodiode. All the measurements were conducted under ambient conditions.

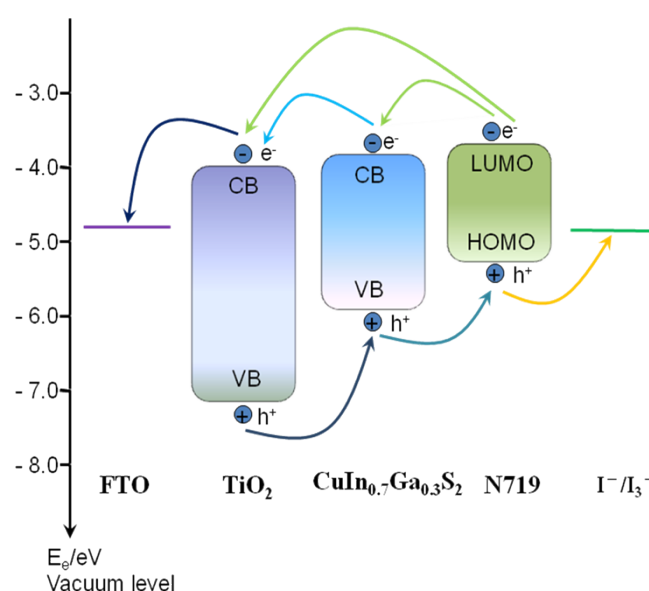

Scheme S1. A schematic showing the relative band energy levels for charge transfer in the FTO/TiO<sub>2</sub>/CIGS/N719 electrolyte.

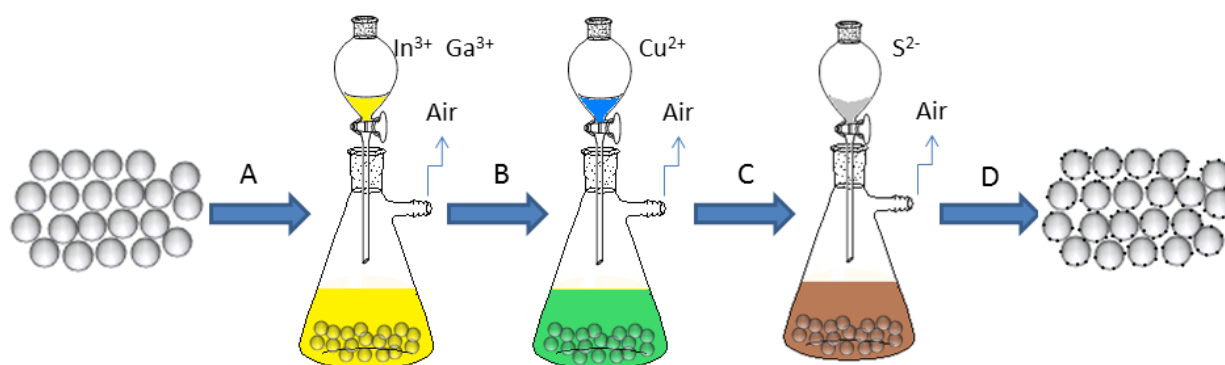

Scheme S2. The schematic process of TiO<sub>2</sub>@CIGS nanoparticles in three steps: (A) adding TiO<sub>2</sub>

nanoparticles sample and mixed solution of  $\text{InCl}_3/\text{GaCl}_3$  into vessel and vacuumizing; (B) after drying the sample, adding the sample and  $\text{CuCl}_2$  aqueous into vessel and vacuumizing; (C, D) repeat step B by substituting  $\text{CuCl}_2$  aqueous and  $\text{Na}_2\text{S}$  aqueous, respectively.

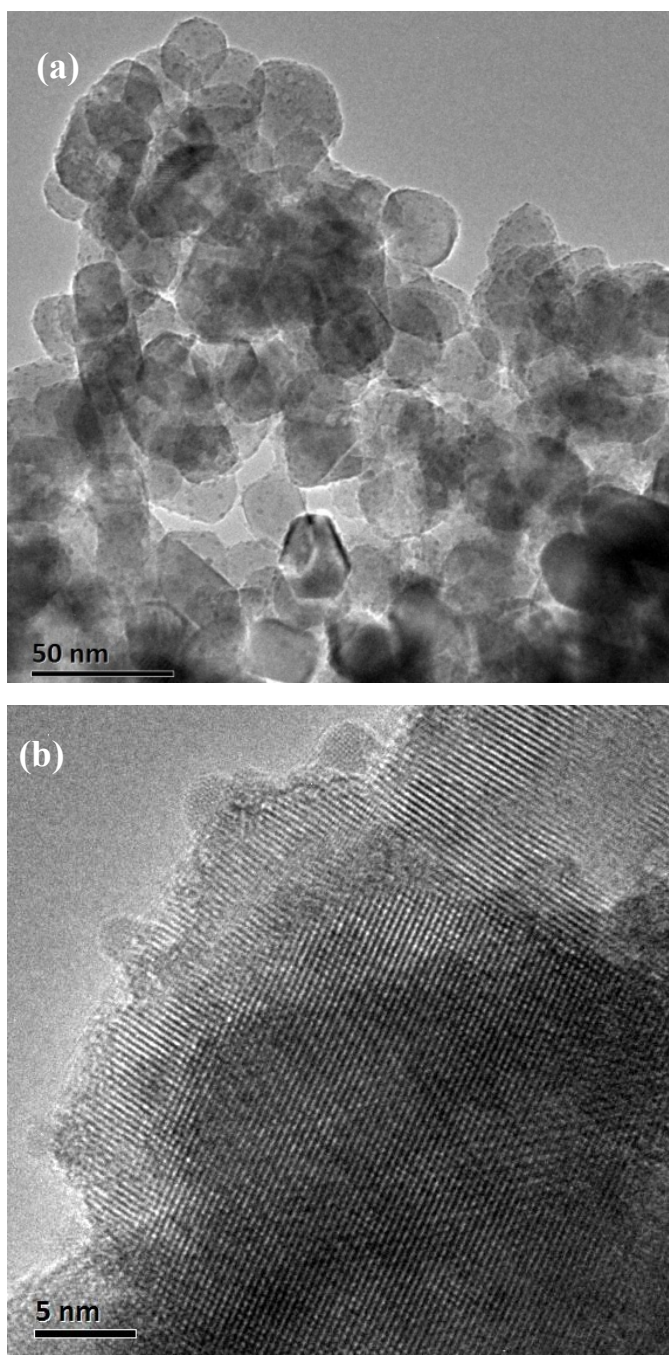

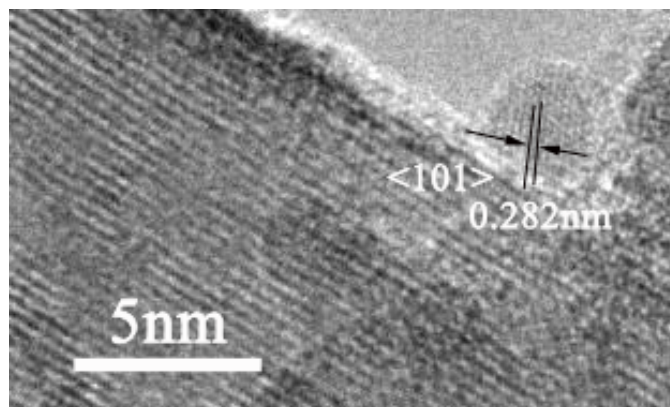

Fig. S1 TEM images (a) and HRTEM image (b,c) of the prepared sample of  $\text{TiO}_2@\text{CIGS}$

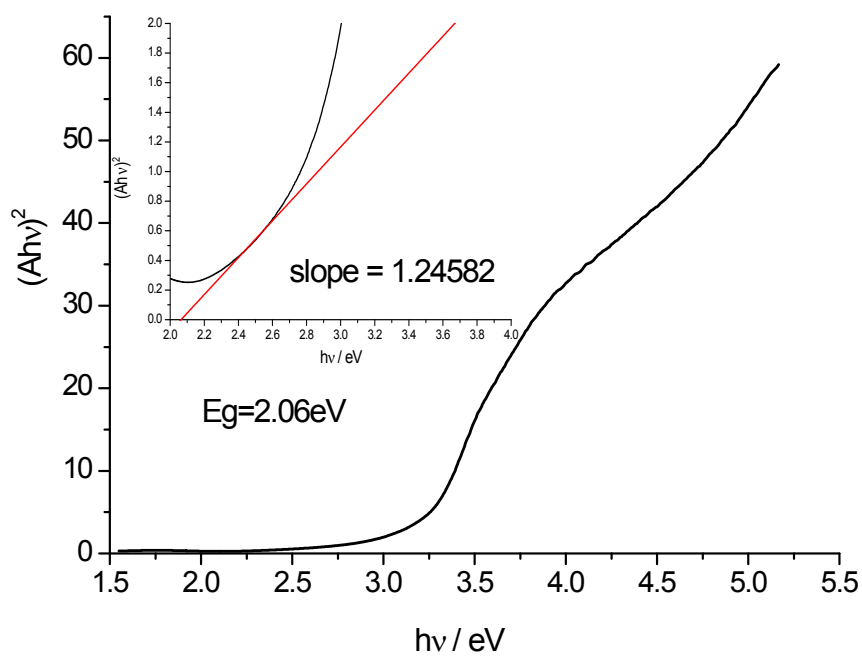

Fig. S2 Plots of  $(Ah\nu)^2$  against the photon energy( $h\nu$ ) for  $\text{TiO}_2@\text{CIGS}$

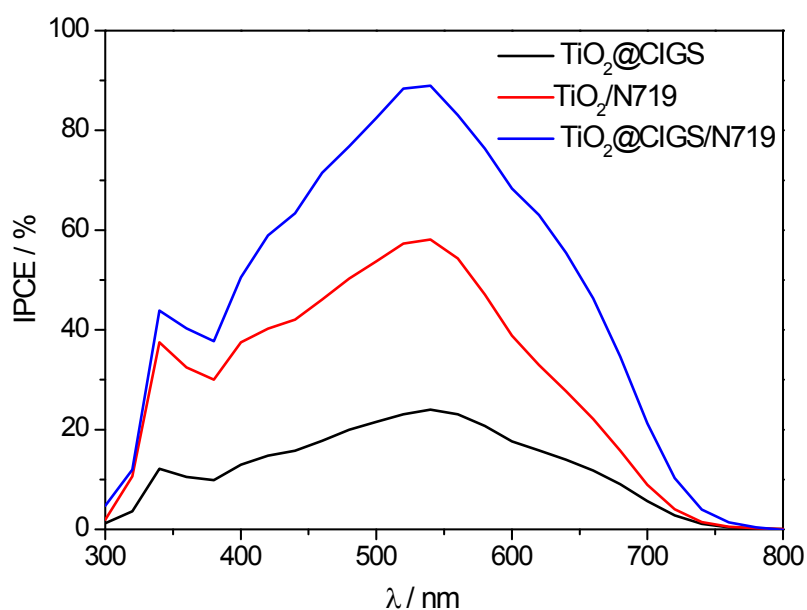

Fig. S3 IPCE spectra of solar cells fabricated with different photo-anode

**Table S1** Structural parameters of samples of TiO<sub>2</sub> NPs and TiO<sub>2</sub>@CIGS

|                        | BET /m <sup>2</sup> • g <sup>-1</sup> | Mesopore<br>Volume/cm <sup>3</sup> • g <sup>-1</sup> | Mesopore Size/nm |
|------------------------|---------------------------------------|------------------------------------------------------|------------------|
| TiO <sub>2</sub> NPs   | 45.24                                 | 0.164                                                | 10               |
| TiO <sub>2</sub> @CIGS | 18.2                                  | 0.084                                                | 10, 3.5          |

**Table S2** Photovoltaic Parameters of Different Solar Cells

|                                  | V <sub>OC</sub> /mV | J <sub>SC</sub> /mA • cm <sup>-2</sup> | η/%  | FF / % |
|----------------------------------|---------------------|----------------------------------------|------|--------|
| TiO <sub>2</sub> @CIGS/N719<br>9 | 767                 | 18.44                                  | 7.51 | 53     |

|                        |     |       |      |    |
|------------------------|-----|-------|------|----|
| TiO <sub>2</sub> /N719 | 730 | 12.28 | 5.51 | 62 |
| TiO <sub>2</sub> @CIGS | 661 | 6.40  | 2.38 | 57 |

---

## Reference:

1. A. B. F. Martinson, T. W. Hamann, M. J. Pellin and J. T. Hupp, *Chemistry - A European Journal*, 2008, **14**, 4458-4467.
